# Supplementary material for: Exploring nursing intern students' experiences of stress and resilience during internship using photovoice
Source: Research Square preprint supplement (doi:10.21203/rs.3.rs-6188343/v1), 2025-04-14
Supplement: Supplementary file 1 [file 1610b3a54f5bc68fd925b595.docx]

**Exploring nursing intern students' experiences of stress and resilience during internship using photovoice**

- **Central/Grand Question**

How do nursing interns experience and navigate the emotional, psychological, and professional challenges of their internship, and what support systems and coping mechanisms do they find most effective?

**Subquestions**

1. How does the perceived weight of responsibility impact nursing interns' stress levels and sense of readiness?
   - **Probing Questions:**
     - Can you describe specific situations where you felt overwhelmed by your responsibilities?
     - How did you perceive your level of preparedness compared to the actual demands of the internship?
     - What are the specific tasks or obligations that contribute most to this feeling of being overwhelmed?
     - How did you manage this feeling?
2. How do interns perceive the impact of responsibility overload on their performance?
3. How does the emotional toll of witnessing patient suffering and navigating complex medical situations affect nursing interns' emotional well-being?
   - **Probing Questions:**
     - Can you describe a particularly emotionally challenging experience you had during your internship?
     - How did you cope with the emotional impact of patient suffering or death?
     - What are the emotional challenges you faced?
     - How did this experience impact your view of nursing?
4. How does dealing with difficult medical situations impact the interns view of their own emotional strength?
5. What role does social support and mentorship play in helping nursing interns build resilience during their internship?
   - **Probing Questions:**
     - How have your relationships with peers and mentors helped you navigate the challenges of your internship?
     - Can you provide examples of specific support you received that was particularly helpful?
     - How important is peer support during internship?
     - How did mentorship help you overcome challenges?
6. How do interns describe the importance of celebrating small victories with peers
7. What self-care strategies do nursing interns employ to manage stress and maintain their mental and emotional health?
   - **Probing Questions:**
     - What specific activities or practices do you find helpful for managing stress?
     - How do you incorporate self-care into your daily routine during the internship?
     - What methods did you use to cope with stress?
     - How effective were these self-care strategies?
8. How does journaling help interns process their experiences?

- **9.** How does the photovoice methodology influence nursing interns' self-awareness and understanding of their internship experiences?
  - **Probing Questions:**
    - How did the process of taking photos and sharing your narratives impact your understanding of your own experiences?
    - What insights did you gain about your coping strategies through the photovoice process?
    - What did you learn about yourself through the photovoice activity?
    - How did sharing your photos and stories with the group affect you?

1. How did the photovoice activity help interns realize they were not alone in their struggles?
2. What recommendations do nursing interns have for improving support systems and building resilience during their internships?
   - **Probing Questions:**
     - What specific changes or additions to the internship program would you recommend?
     - What types of support do you believe would be most beneficial for future interns?
     - What support do you feel is currently lacking?
     - How can hospitals and nursing schools better collaborate to support interns?
3. What suggestions do the interns have for systemic change within nursing internships?
